# Supplementary material for: Synthesis, theoretical calculations and laser flash photolysis studies of selected amphiphilic porphyrin derivatives used as biofilm photodegradative materials
Source: Royal Society of Chemistry journal article supplement (doi:10.1039/d1nj02651h), 2021-01-01
Supplement: d1nj02651h1.pdf [file d1nj02651h1.pdf]

**Journal: New Journal of Chemistry**

**Supporting Information**

**Synthesis, theoretical calculations and laser flash photolysis studies of selected amphiphilic porphyrin derivatives used as biofilms photodegradative materials**

**Yolande Ikala Openda<sup>a</sup>, Bokolombe Pitchou Ngoy<sup>a,b</sup>, Jules Tshishimbi Muya<sup>b</sup> and Tebello Nyokong<sup>a\*</sup>**

<sup>a</sup> Institute for Nanotechnology Innovation, Department of Chemistry, Rhodes University, Makhanda 6140, South Africa.

<sup>b</sup> Département de Chimie, Université de Kinshasa, Kinshasa, Democratic Republic of the Congo

### Equations employed

The fluorescence quantum yield values of the porphyrin complexes alone or their conjugates were recorded using a comparative method reported in literature with equation 1.<sup>1</sup>

$$\Phi_F = \Phi_{F(\text{Std})} \frac{F \cdot A_{\text{Std}} \cdot n^2}{F_{\text{Std}} \cdot A \cdot n_{\text{Std}}^2} \quad (1)$$

In this equation  $F$  and  $F_{\text{Std}}$  are the area under the emission curves of the sample and standard, respectively.  $A$  and  $A_{\text{Std}}$  are the absorbance values corresponding to the excitation wavelength of the studied samples and standard, respectively.  $n$  and  $n_{\text{Std}}$  express the refractive index of the solvents used to prepare the solution of the studied samples and standard, respectively. The TPP was used as a standard with the value:  $\Phi_F = 0.14$ .<sup>2</sup>

The determination of the singlet oxygen quantum yields ( $\Phi_{\Delta}$ ) values of the prepared Ps and nanoconjugates were carried out following a UV/Vis spectroscopic method in DMSO. The monitoring was done spectroscopically following the photobleaching of 9, 10-dimethylanthracene (DMA) as a singlet oxygen scavenger. TPP ( $\Phi_{\Delta} = 0.52$  in DMSO)<sup>3</sup> was utilized as standard for comparative purpose using equation 2.

$$\Phi_{\Delta} = \Phi_{\Delta}^{\text{Std}} \frac{R \cdot I_{\text{abs}}^{\text{Std}}}{R^{\text{Std}} \cdot I_{\text{abs}}} \quad (2)$$

Where  $\Phi_{\Delta}^{\text{Std}}$  is the singlet oxygen quantum yield for the standard,  $R$  and  $R^{\text{Std}}$  are the DMA photobleaching rates in the presence of Ps derivatives under investigation and the standard, respectively.  $I_{\text{abs}}$  and  $I_{\text{abs}}^{\text{Std}}$  are the rates of light absorption by the Ps derivative and standard, respectively.  $I_{\text{abs}}$  is determined by Eq. 3.

$$I_{\text{abs}} = \frac{\alpha \cdot A \cdot I}{N_A} \quad (3)$$

Where  $\alpha$  is the fraction of light absorbed,  $A$  is the cell area irradiated,  $N_A$  is Avogadro's constant and  $I$  is the light intensity.

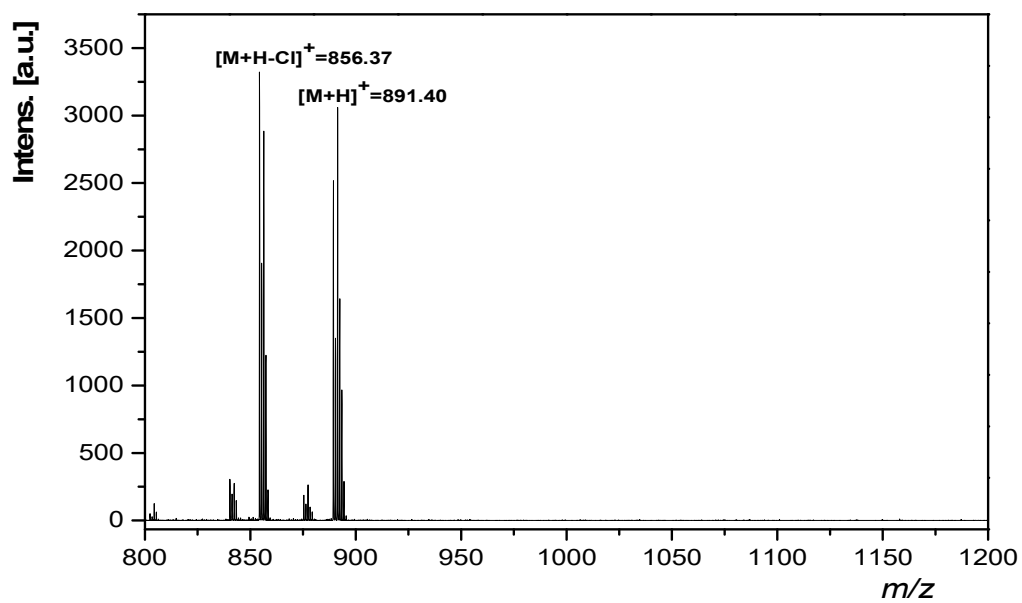

Fig. S1 Mass spectrum of complex 2.

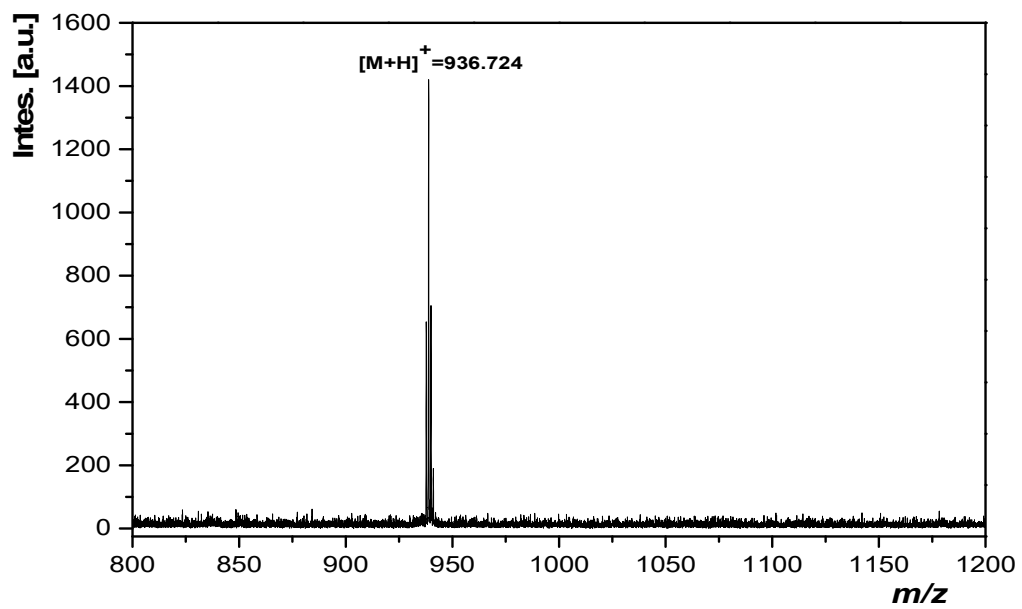

Fig. S2 Mass spectrum of complex 3.

(A)

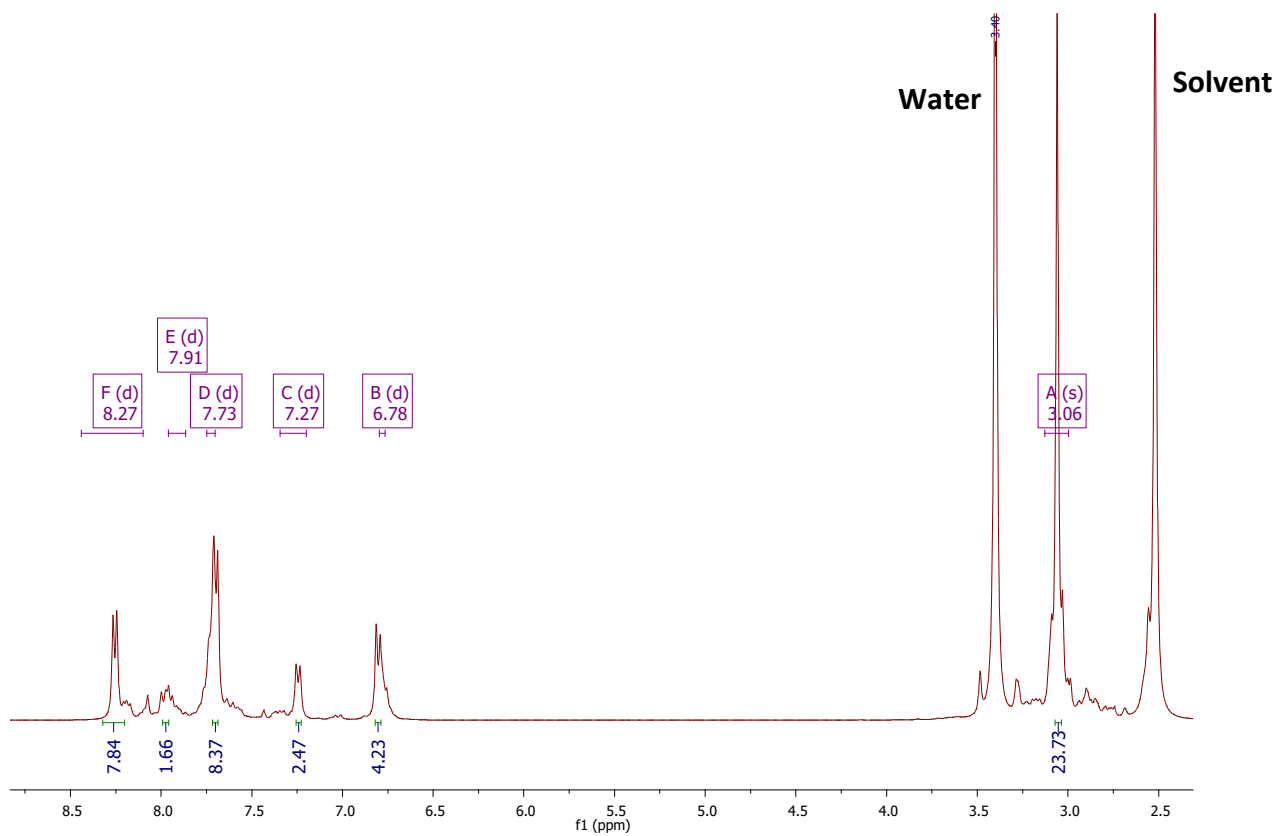

(B)

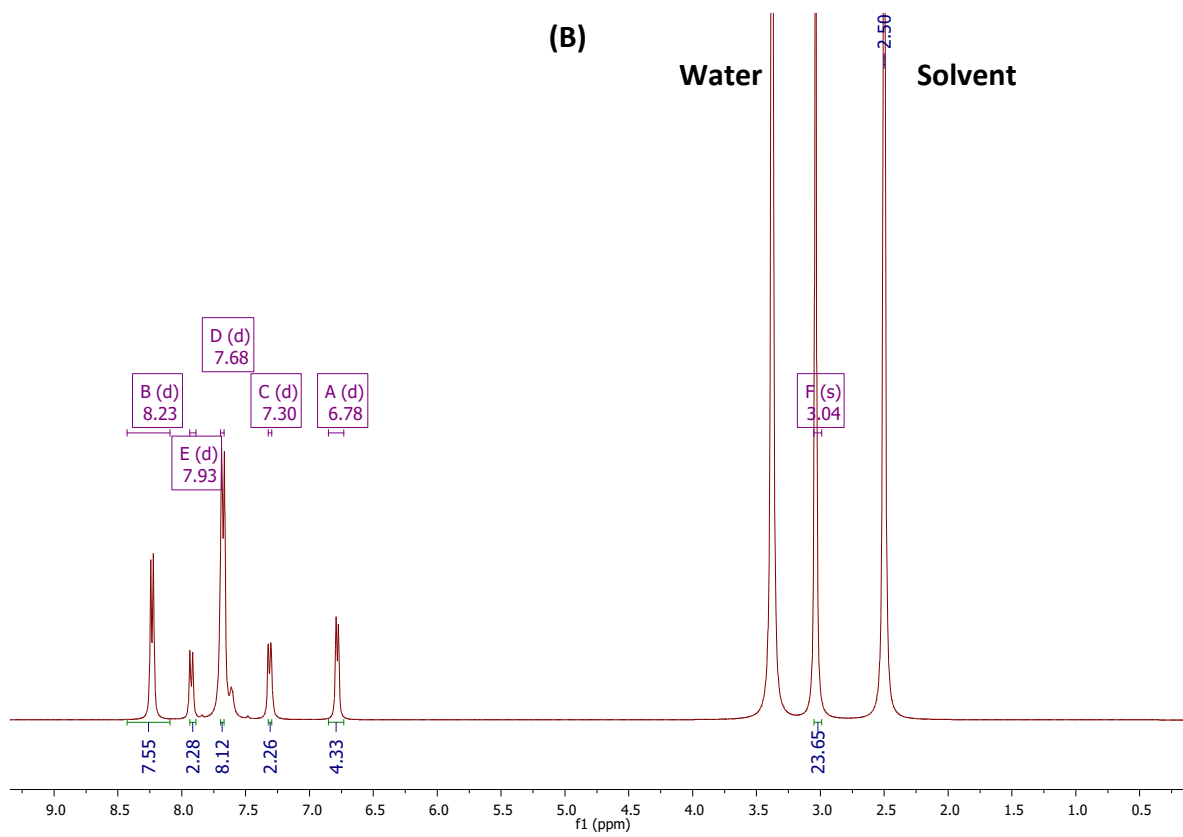

Fig. S3 <sup>1</sup>H NMR spectrum (400 MHz, DMSO-*d*<sub>6</sub>) of complex (A) **3** and (B) **2**

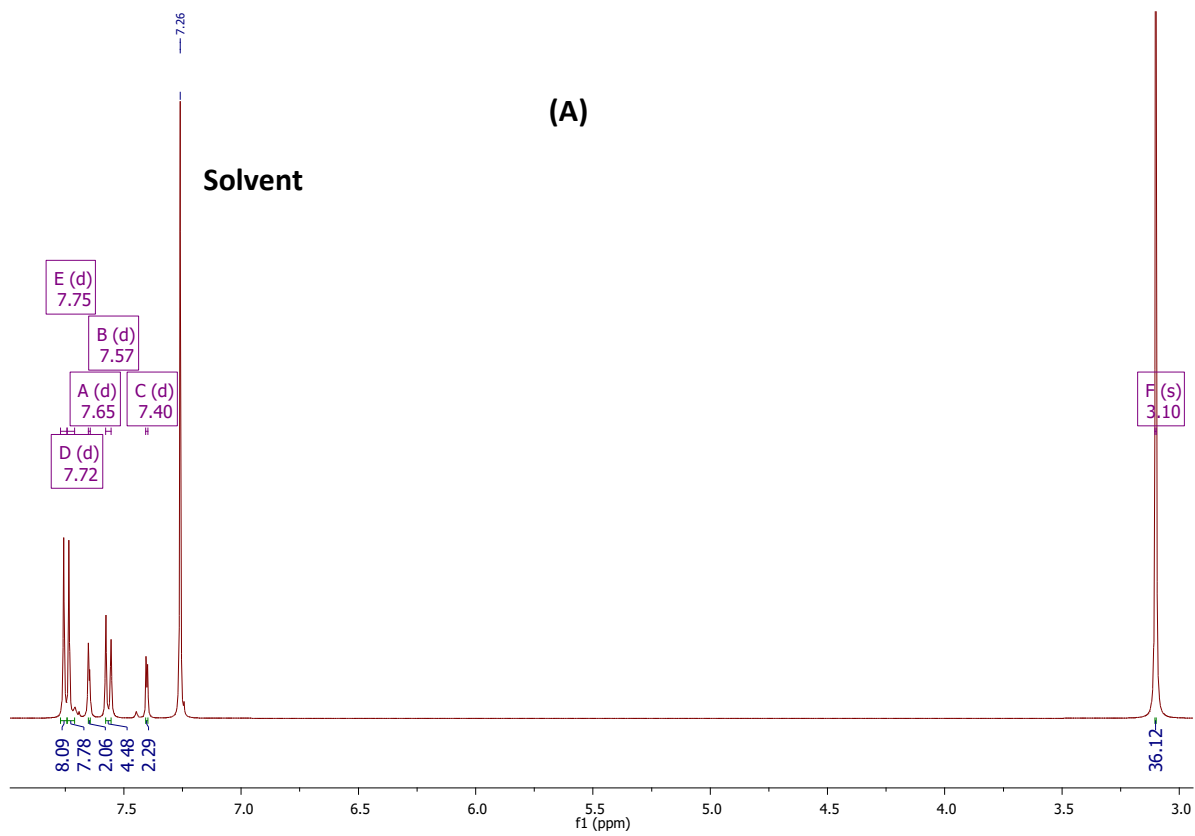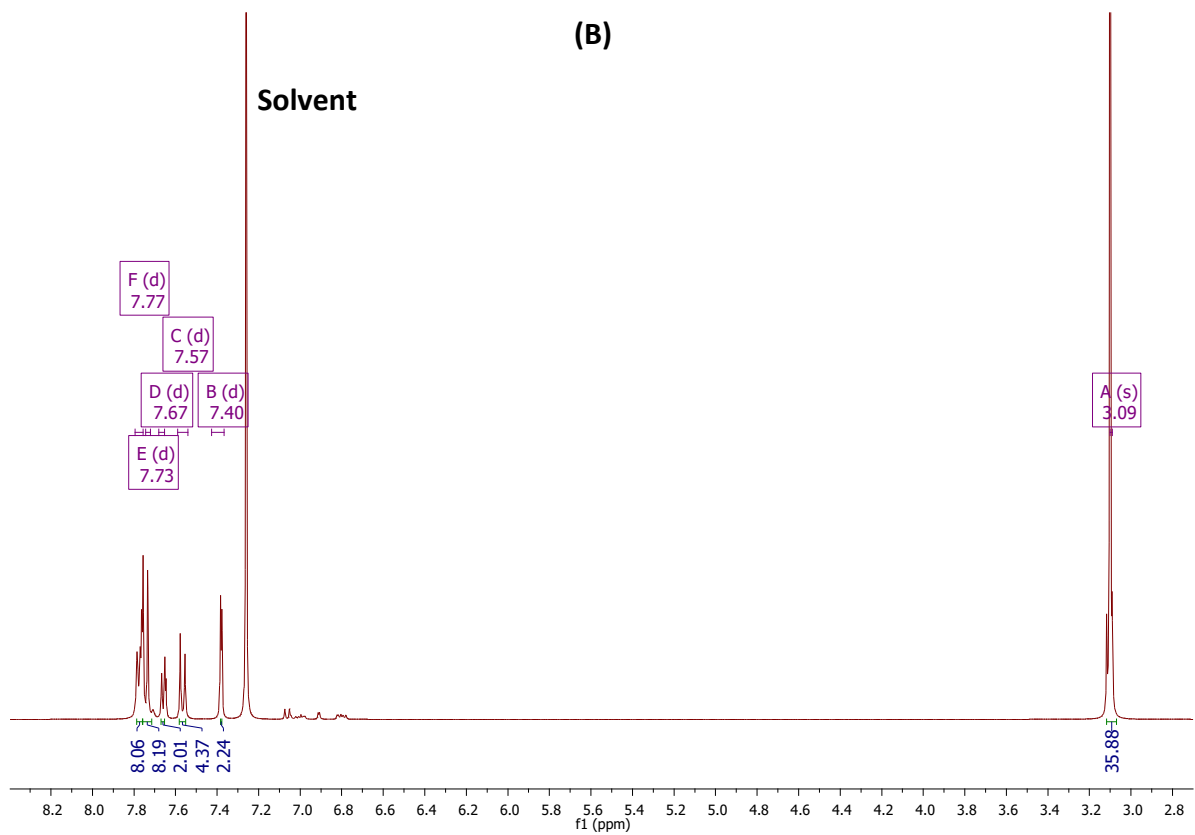

Fig. S4  $^1\text{H}$  NMR spectrum (400 MHz,  $\text{CDCl}_3$ ) for complex (A): **2a** and (B) **3a**.

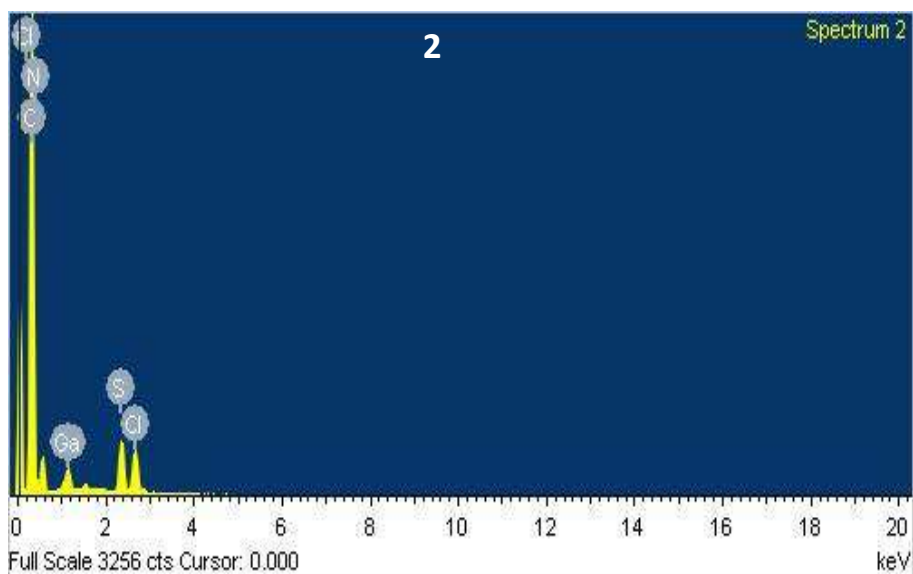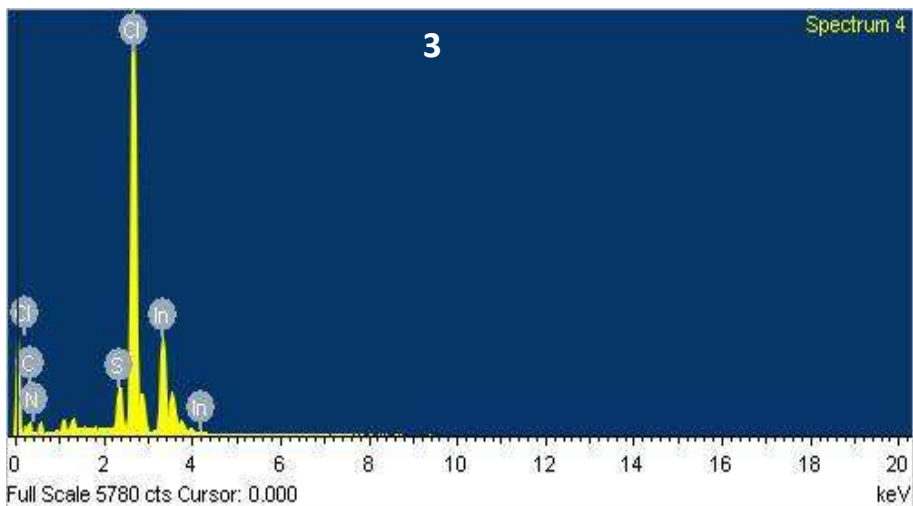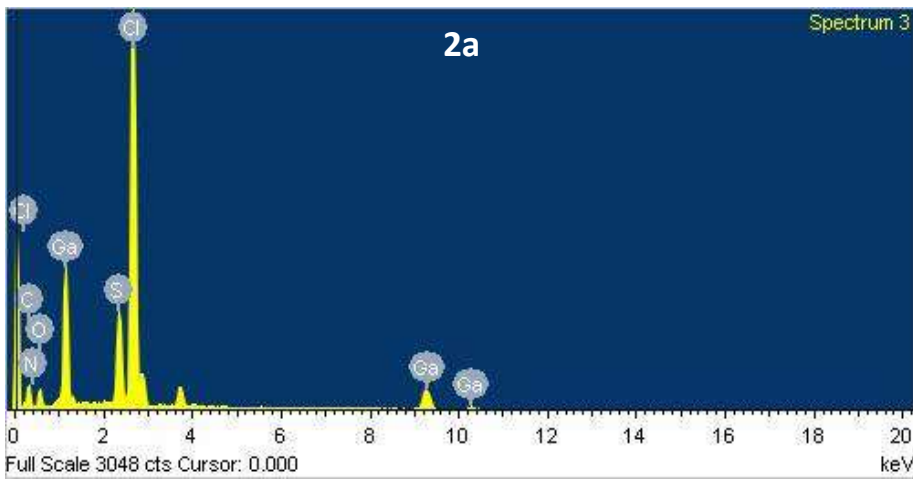

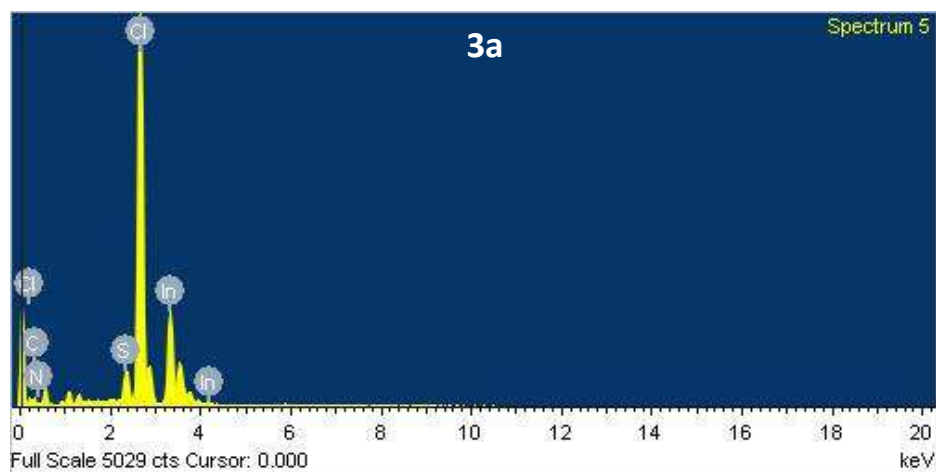

Fig. S5. EDX spectra for elemental analysis of the synthesized complexes **2**, **3**, **2a** and **3a**

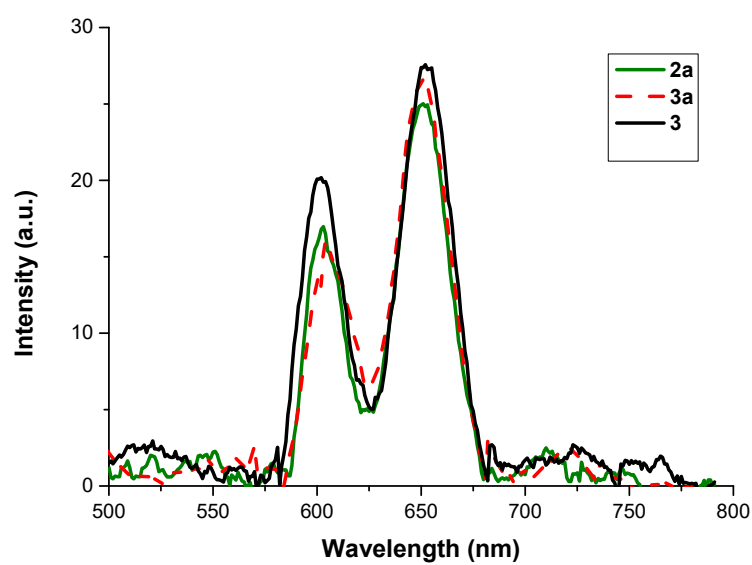

Fig. S6 Typical emission spectra of Porphyrins (**2a**, **3a** and **3**) in DMSO

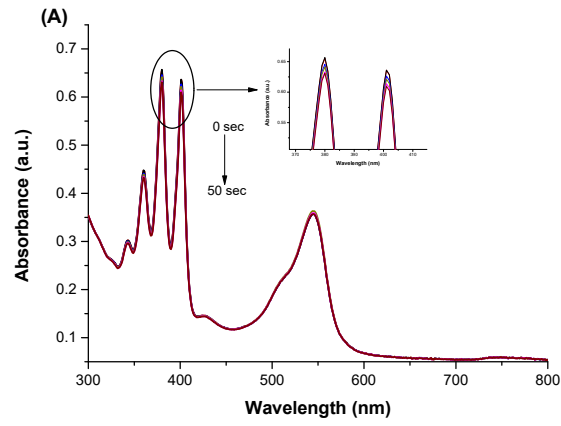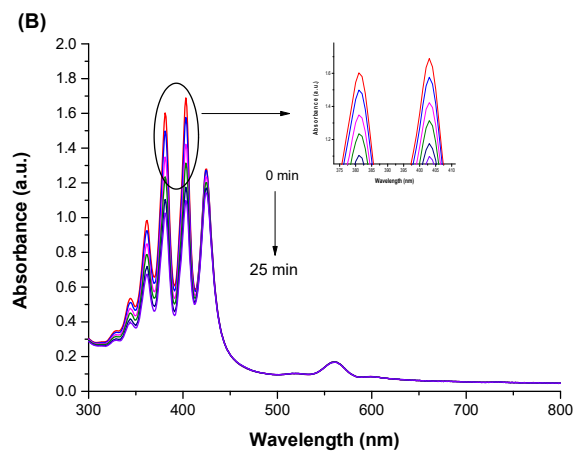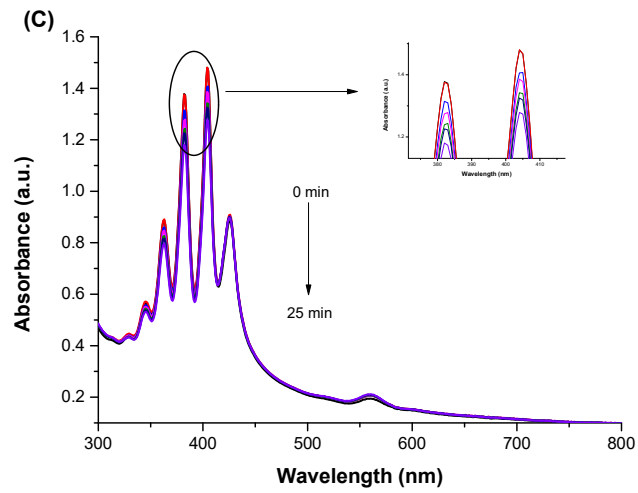

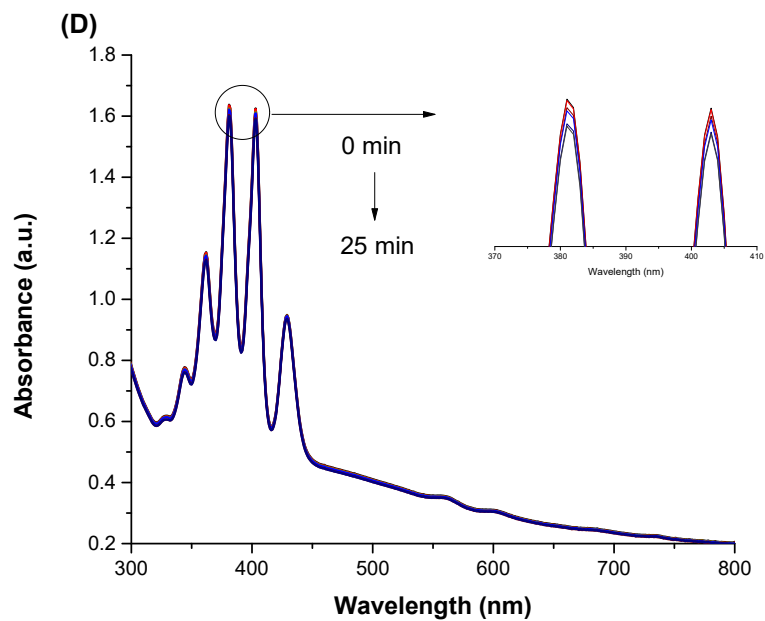

**Fig. S7** Typical photodegradation spectra of ADMA **(A)** in the presence of RB; **(B)** in the presence of **3a**; **(C)** in the presence of **2a**; **(D)** in the presence of **2** in water (DMSO:PBS, 1:99 v/v).

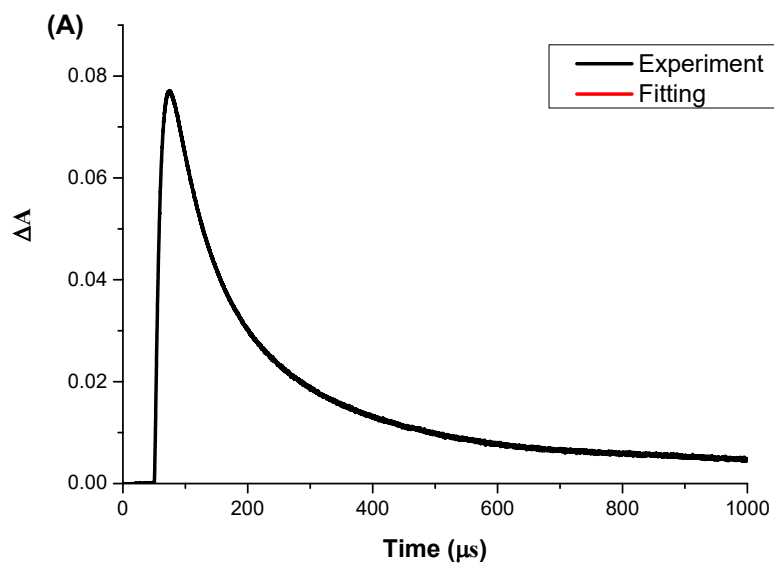



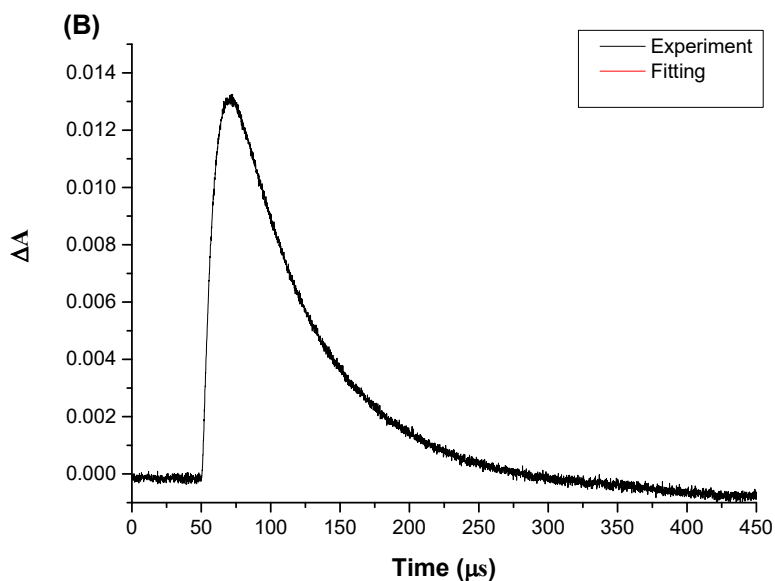

**Fig. S8** Transient decay curve ( $\lambda_{\text{exc}} = 425 \text{ nm}$ ) of (A) **2a**, and (B) **3a** in degassed DMSO (as an examples)

**Table S1** Conductivity or specific conductance of the quaternized porphyrin derivatives at 25 °C.

| Sample                            | Conductivity<br>( $\mu\text{S}/\text{cm}$ ) |
|-----------------------------------|---------------------------------------------|
| <b>Water alone</b>                | $213.7 \pm 0.6$                             |
| <b>2a</b><br>(14 mg in 3mL water) | $451.7 \pm 1.2$                             |
| <b>3a</b><br>(14 mg in 3mL water) | $426.7 \pm 1.2$                             |

## References

1. A. Ogunsipe, J.Y. Chen and T. Nyokong, *New. J. Chem.*, 2004, **7**, 822-827.
2. J.S. Hsiao, B.P. Krueger, R.W. Wagner, T.E. Johnson, J.K. Delaney, D.C. Mauzerall, G.R. Fleming, J.S. Lindsey, D.F. Bocian, R.J. Donohoe, *J. Am. Chem. Soc.*, 1996, **118**, 11181-11193.
3. A.R. Da Silva, A.C. Pelegrino, A.C. Tedesco, R.A. Jorge, *J. Braz. Chem. Soc.*, 2008, **19**, 491-501.
